# Supplementary material for: Epigenetic controls of Sonic hedgehog guarantee fidelity of epithelial adult stem cells trajectory in regeneration
Source: PubMed Central journal article supplement (PMC9307244; doi:10.1126/sciadv.abn4977), 2022-07-22
Supplement: sciadv.abn4977_sm.pdf [file sciadv.abn4977_sm.pdf]

Supplementary Materials for  
**Epigenetic controls of Sonic hedgehog guarantee fidelity of epithelial adult stem cells trajectory in regeneration**

Fanyuan Yu *et al.*

Corresponding author: Liwei Zheng, [liwei.zheng@scu.edu.cn](mailto:liwei.zheng@scu.edu.cn); Ling Ye, [yeling@scu.edu.cn](mailto:yeling@scu.edu.cn)

*Sci. Adv.* **8**, eabn4977 (2022)  
DOI: 10.1126/sciadv.abn4977

**This PDF file includes:**

Figs. S1 to S3  
Table S1

**Supplemental Figure Legends**  
**Fig S1**

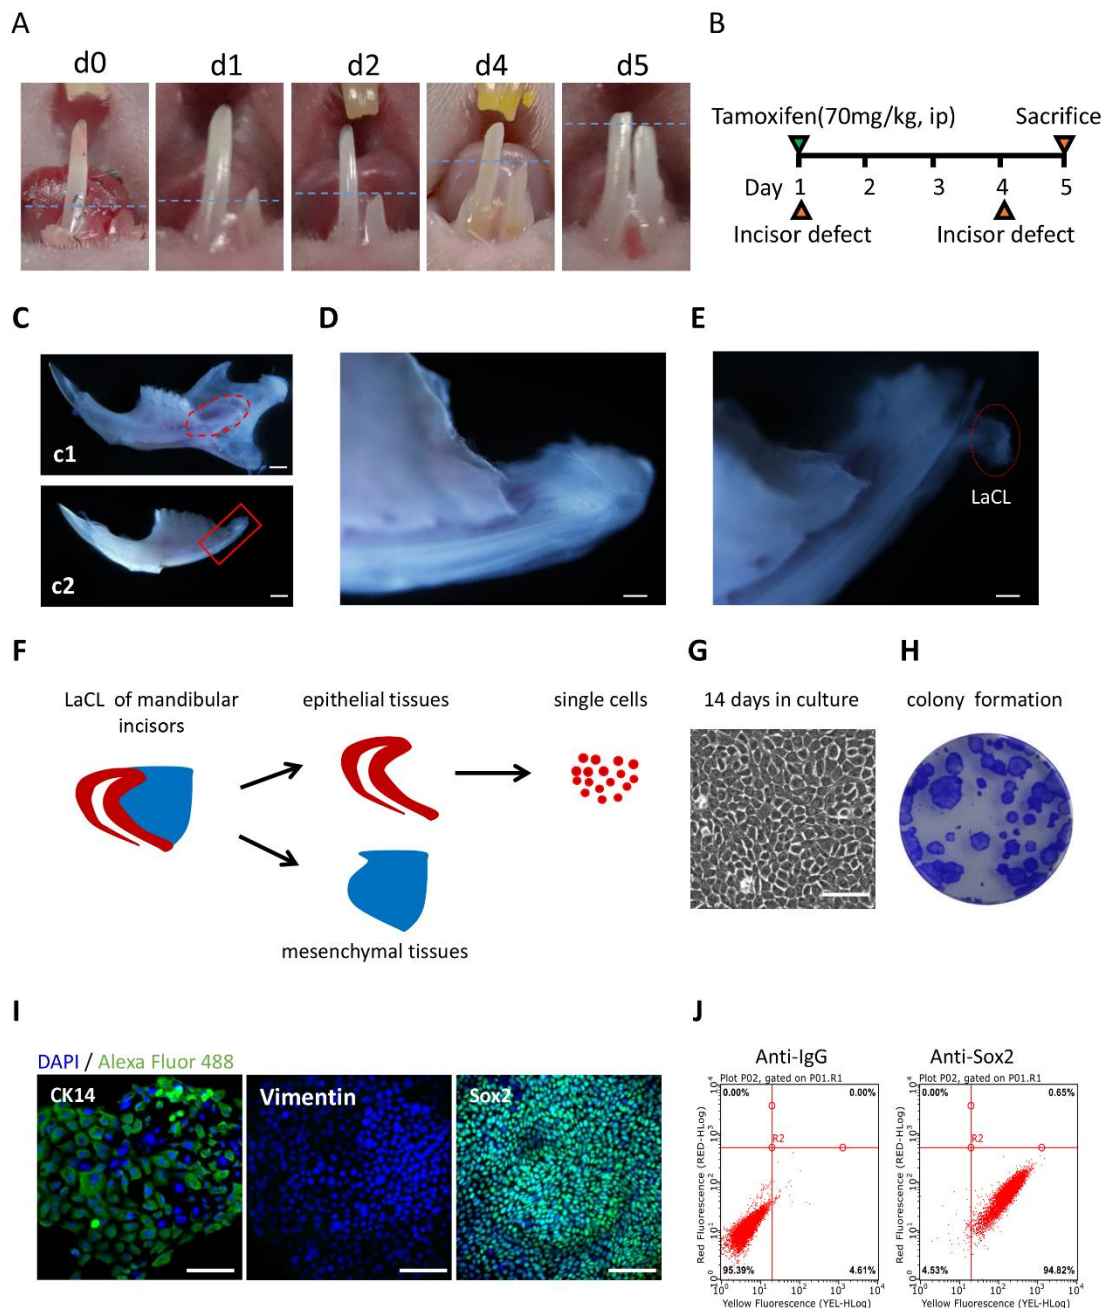

Supplemental figure 1. (A) Photograph images of incisors at different time points after clipping. (B) Schematic illustration of tamoxifen administration plan and the time points selected to clip incisors in Fig. 2I; ip, interperitoneal injection. (C-E) Stereomicroscopic images of dissection and isolation of LaCL: (c1-c2) mandibular incisors before or after surrounding jaw bone was removed; (D) high magnification of apical bud that was boxed in c2; (E) LaCL that was mechanically isolated. (F) Schematic images depicting isolation and culture of DESCs. (G) Microscopic image in

bright field. (H) Crystal violet staining 14 days after primary cell culture. (I) Immunofluorescent images of CK14, Sox2 and Vimentin in DESCs cultured *in vitro*. (J) Cytoflow analysis on Sox2 positive percentages in primary DESCs cultured *in vitro*. *In vivo* representative images were generated from at least six slices from six mice for each group. Experiments in DESCs was repeated at least three times with three duplicates for each group. Scale bars, 50  $\mu$ m in C, D and E; 25  $\mu$ m in G and I.

**Fig S2**

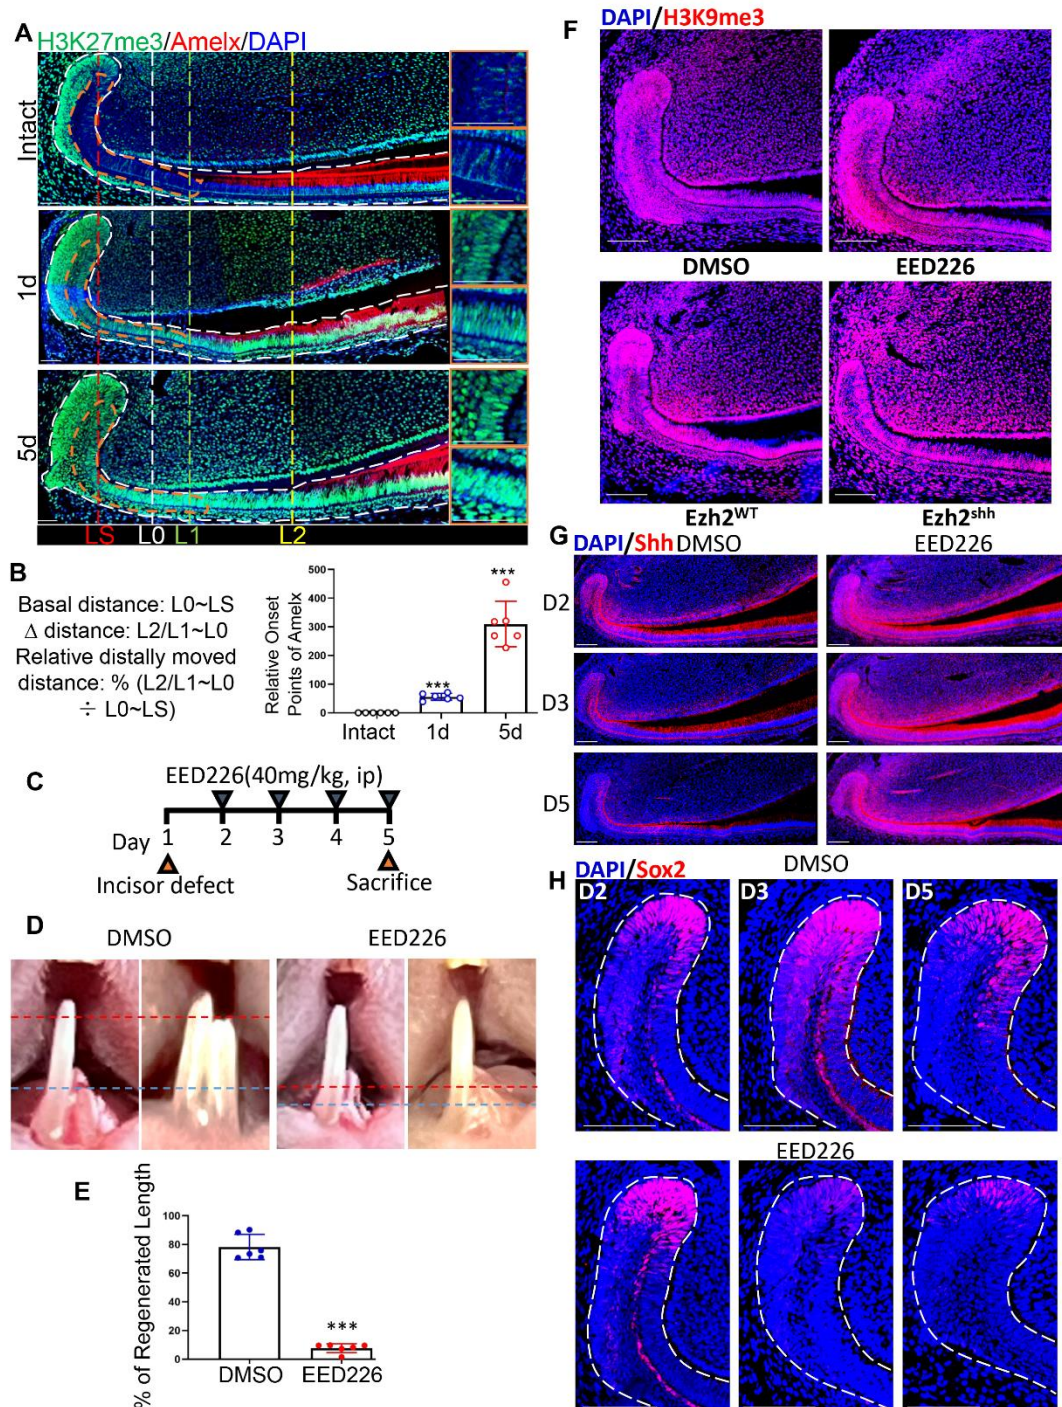

Supplemental figure 2. (A) Double staining immunofluorescent images of H3K27me3 and Amelx. LS, line showing the summit of LaCL; L0, line showing start site of Amelx

deposit in intact condition; L1, line showing start site of Amelx deposit at 1d-post clipping; L2, line showing start site of Amelx deposit at 5d-post clipping. Injury-induced-H3K27me3 in IEE at day1 and 5 post-clipping were dotted in brown. (B) The relative distally moved distance about the onset point of Amelx expression in (A). (C) Timeline schematic of the EED226 administration strategy which were used in (D), (E), (G), and (H). (D) Photographs of incisor at d5-post clipping. (E) Statistic data of relative regenerated length at d5-post clipping. (F) Representative IF images of H3K9me3 in intact incisors. (G) Representative IF images of Shh. (H) Representative IF images of Sox2. \*\*\*,  $p < 0.001$ . Scale bar, 50  $\mu\text{m}$ .

**Fig S3**

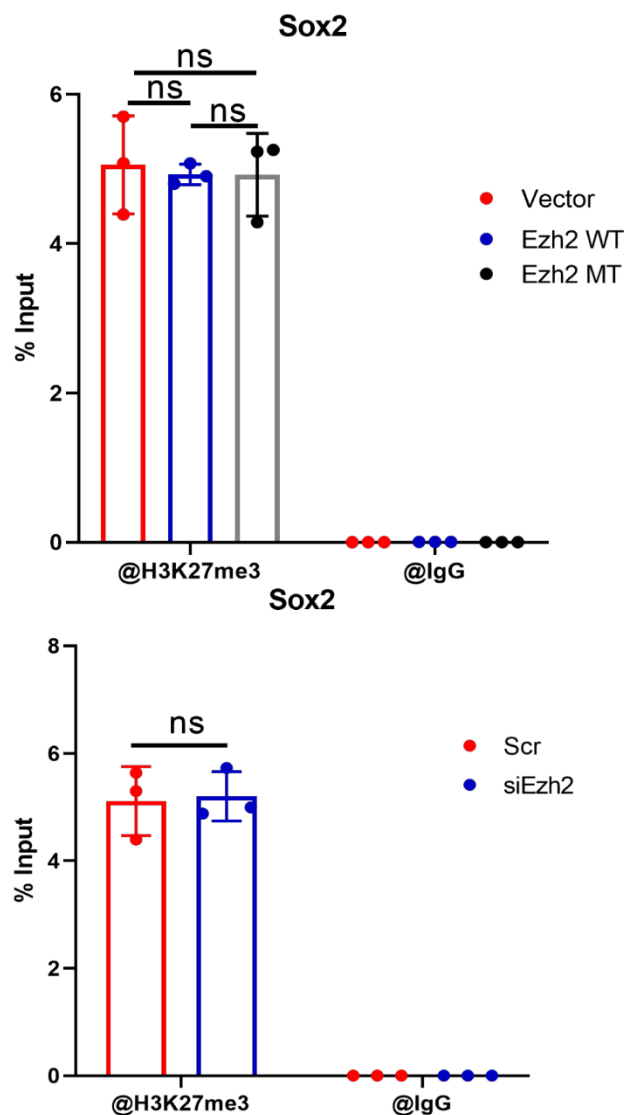

Supplemental figure 3. ChIP-qPCR data of H3K27me3 within the promoter region of Sox2 gene. Experiments in DESCs was repeated at least three times with three duplicates for each group. Data are means  $\pm$  SEM;  $n = 3$ . ns, no statistical significance.

**Supplemental Table S1**

**Key Resources Table**

| Reagent or Resource | Source | Identifier |
|---------------------|--------|------------|
|---------------------|--------|------------|



| Antibodies                                                        |                |                    |
|-------------------------------------------------------------------|----------------|--------------------|
| Anti-Tri-Methyl-Histone H3 (Lys27)<br>(H3K27me3) Rabbit mAb       | Cell Signaling | Cat#9733           |
| Anti-Tri-Methyl-Histone H3 (Lys9)<br>(H3K9me3) Rabbit mAb         | Cell Signaling | Cat#13969          |
| Anti-Ezh2 Rabbit mAb                                              | Cell Signaling | Cat#5246           |
| Anti-Sox2 Rabbit mAb                                              | Abcam          | Cat#ab92494        |
| Anti-Ki67 Rabbit mAb                                              | Abcam          | Cat#ab16667        |
| Anti-Shh Rabbit mAb                                               | Abcam          | Cat#ab53281        |
| Anti-mCherry Rabbit mAb                                           | Abcam          | Cat#ab167453       |
| Anti-Amelogenin Mouse mAb                                         | Santa Cruz     | Cat#sc365284       |
| Anti- Keratin 14 Rabbit mAb                                       | Abcam          | Cat#ab181595       |
| Anti- Vimentin Rabbit mAb                                         | Abcam          | Cat#ab92547        |
| Anti-Ptch1 Rabbit polyclonal Ab                                   | SAB            | Cat #35897         |
| Anti-Gli1 Rabbit polyclonal Ab                                    | SAB            | Cat#43926          |
| Anti-Histone H3 Rabbit mAb                                        | Cell Signaling | Cat# 60932         |
| Anti-Shh Rabbit polyclonal Ab                                     | Novus          | Cat# NBP2-22139    |
| Normal Rabbit IgG                                                 | Cell Signaling | Cat# 2729          |
| Goat anti-Rabbit IgG-H&L (Alexa Fluor® 647)                       | Abcam          | Cat# ab150087      |
| Goat anti-Rabbit IgG-H&L (Alexa Fluor® 488)                       | Abcam          | Cat# ab150077      |
| Goat anti-Mouse IgG-H&L (Alexa Fluor® 488)                        | Abcam          | Cat# ab150117      |
| Goat anti-rabbit IgG (HRP)                                        | Abcam          | Cat# ab6721        |
| Goat anti-mouse IgG (HRP)                                         | Abcam          | Cat# ab6789        |
| Bacterial and Virus Strains                                       |                |                    |
| Ezh2 WT                                                           | Hanbio         | In this paper      |
| Ezh2 MT                                                           | Hanbio         | In this paper      |
| Ezh2 vector (mCherry)                                             | Hanbio         | In this paper      |
| Chemicals, and Recombinant Proteins                               |                |                    |
| EED226                                                            | Selleck        | Cat#S8496          |
| Dulbecco's Modified Eagle Medium/Nutrient Mixture F-12 (DMEM/F12) | Gibco          | Cat# 11320033      |
| B-27 Plus Supplement                                              | Gibco          | Cat# A3582801      |
| Penicillin-streptomycin (P/S)                                     | Gibco          | Cat#15140122       |
| Recombinant Mouse FGF basic Protein                               | R&D Systems    | Cat#3139-FB-025/CF |
| Recombinant Mouse EGF Protein                                     | R&D Systems    | Cat#2028-EG-200    |
| 4% paraformaldehyde                                               | Boster         | Cat#AR1068         |
| HiScript III RT SuperMix for qPCR                                 | Vazyme         | Cat#R323-01        |
| AceQ Universal SYBR qPCR Master Mix                               | Vazyme         | Cat#Q511-02        |

|                                                   |                                             |                                                                                                                                            |
|---------------------------------------------------|---------------------------------------------|--------------------------------------------------------------------------------------------------------------------------------------------|
| Triton X-100                                      | Thermo Scientific                           | Cat#85111                                                                                                                                  |
| PBS                                               | Boster                                      | Cat#AR1155                                                                                                                                 |
| Dimethyl sulfoxide (DMSO)                         | Sigma-Aldrich                               | Cat#D8418                                                                                                                                  |
| DAPI Staining Solution                            | Beyotime                                    | Cat#C1005                                                                                                                                  |
| Tamoxifen                                         | Sigma-Aldrich                               | Cat#T5648                                                                                                                                  |
| Lipofectamine™ 3000 Transfection Reagent          | Invitrogen                                  | Cat#L3000001                                                                                                                               |
| Halt™ Protease and Phosphatase Inhibitor Cocktail | Thermo Scientific                           | Cat#78441B                                                                                                                                 |
| Luminata Forte Western HRP substrate              | Millipore Corp                              | Cat#WBLUC0100                                                                                                                              |
| Experimental Models: Mouse Lines                  |                                             |                                                                                                                                            |
| B6.129S6-Shhtm2(cre/ERT2)Cjt/J                    | JAX Lab                                     | Stock#005623                                                                                                                               |
| tdTomato                                          | JAX Lab                                     | Stock#007914                                                                                                                               |
| B6;129S1-Ezh2tm2Sho/J                             | JAX Lab                                     | Stock# 022616                                                                                                                              |
| C57/B6J                                           | Chengdu Dashuo Experimental Animals Company | C57/B6J                                                                                                                                    |
| Critical Commercial Assays                        |                                             |                                                                                                                                            |
| HiScript III RT SuperMix for qPCR                 | Vazyme                                      | Cat#R323-01                                                                                                                                |
| AceQ Universal SYBR qPCR Master Mix               | Vazyme                                      | Cat#Q511-02                                                                                                                                |
| Masson's Trichrome Stain Kit                      | Solarbio                                    | Cat# G1340                                                                                                                                 |
| Hematoxylin-Eosin/HE Staining Kit                 | Solarbio                                    | Cat# G1120                                                                                                                                 |
| RNeasy Micro kit                                  | Qiagen                                      | Cat#74004                                                                                                                                  |
| Chromatin-Prep-Kit                                | Millipore                                   | Cat#MM_NF-17-10461                                                                                                                         |
| HiSens-Chromatin-Immunoprecipitation-Kit          | Millipore                                   | Cat#MM_NF-17-375                                                                                                                           |
| M-PER™ Mammalian Protein Extraction Reagent       | Thermo Scientific                           | Cat#78505                                                                                                                                  |
| Oligonucleotides                                  |                                             |                                                                                                                                            |
| Mouse Ezh2 siRNA                                  | Origene                                     | SR419773                                                                                                                                   |
| RT-qPCR primers                                   | Sangon Biotech                              | appendix table 2                                                                                                                           |
| ChIP-qPCR primers                                 | Sangon Biotech                              | appendix table 3                                                                                                                           |
| Software and Algorithms                           |                                             |                                                                                                                                            |
| GraphPad Prism software v7.03                     | GraphPad                                    | <a href="https://www.graphpad.com/scientific-software/prism/">https://www.graphpad.com/scientific-software/prism/</a> ;<br>RRID:SCR_002798 |
| Image-Pro Plus 7.0                                | Media Cybernetics                           | <a href="https://www.media-cy.com/imageproplus">https://www.media-cy.com/imageproplus</a> ;<br>RRID:SCR_007369                             |

### Primers for quantitative expression analysis of RT-PCR

| Gene name         |         | Primer sequence          |
|-------------------|---------|--------------------------|
| <i>Ezh2</i>       | Forward | AAAGAACTCACGGAGCAGCA     |
|                   | Reverse | GGAAGGGATGTAGGAAGCAGT    |
| <i>Suz12</i>      | Forward | AGCAGTGGCCACAATCGTCTCTAT |
|                   | Reverse | TGGAGGTTCCACAGCTTCATCACT |
| <i>Eed</i>        | Forward | ATGCTGTCAGTATTGAGAGTGGC  |
|                   | Reverse | GAGGCTGTTCACACATTTGAAAG  |
| <i>Ezh1</i>       | Forward | CCAGACTGCCAGAATCGCTTT    |
|                   | Reverse | CAGGTGCTTTTTGAGGCCA      |
| <i>Gapdh</i>      | Forward | TCCCACTCTTCCACCTTCGATGC  |
|                   | Reverse | GGGTCTGGGATGGAAATTGTGAG  |
| <i>Sox2</i>       | Forward | TAGAGCTAGACTCCGGGCGATGA  |
|                   | Reverse | TTGCCTTAAACAAGACCACGAAA  |
| <i>Amelogenin</i> | Forward | TTCAGCCTCATCACCACCTT     |
|                   | Reverse | AGGGATGTTTGGCTGATGGT     |
| <i>Shh</i>        | Forward | CTGGCCAGATGTTTTCTGGT     |
|                   | Reverse | GATGTCGGGGTTGTAATTGG     |
| <i>Gli1</i>       | Forward | CCTTTAGCAATGCCAGTGACC    |
|                   | Reverse | GAGCGAGCTGGGATCTGTGTAG   |
| <i>Gli2</i>       | Forward | AGCTCCACACACCCGCAACA     |
|                   | Reverse | TGCAGCTGGCTCAGCATCGT     |
| Gli3              | Forward | CAACCACAGCCCTTGCTTTGC    |
|                   | Reverse | GGCCACCCGAGCTATAGTTG     |

### Primers used for ChIP-qPCR

| Gene name |         | Primer sequence        |
|-----------|---------|------------------------|
| Shh-Rg1   | Forward | CTGTTTTCAACAACCCCGT    |
|           | Reverse | GCTGCTTCCCCCTTACTT     |
| Shh-Rg2   | Forward | ACCCACCAAGCACACA       |
|           | Reverse | GCACCACATTCAAGCC       |
| Shh-Rg3   | Forward | TGTGAGTAGGATGGGAGAA    |
|           | Reverse | CAGACTGAAGGTGTTAGGG    |
| Shh-Rg4   | Forward | GAATCTGTACTTGGTCCT     |
|           | Reverse | GCTTTTGAGTTAGTGTGA     |
| Shh-Rg5   | Forward | CAGCAGGAGGAATAGC       |
|           | Reverse | TCCCAGACACCAGACA       |
| Shh-Rg6   | Forward | GGCTTAGGGCTTCTCCTTGGCT |

|      |         |                         |
|------|---------|-------------------------|
|      | Reverse | GGCTCTTTGGCTCCTCCTTGCT  |
| Sox2 | Forward | TTTAGGGTAAGGTACTGGGAAGG |
|      | Reverse | GAGCCCGGGAAATTCTTTA     |
